# Supplementary material
Source: PubMed Central journal article supplement (PMC5624855)
Supplement: NIHMS902636-supplement.pdf [file NIHMS902636-supplement.pdf]

## **Supplement**

Purification of metal-dependent lysine deacetylases with consistently high activity

Tasha B. Toro, Richard G. Painter, Rashad A. Haynes, Elena Y. Glotser, Melyssa R. Bratton,  
Jenae R. Bryant, Kyara A. Nichols, Asia N. Matthew-Onabanjo, Ashley N. Matthew, Derek R.  
Bratcher, Chanel D. Perry, Terry J. Watt\*

**Figures S1-S4**

**Table S1**

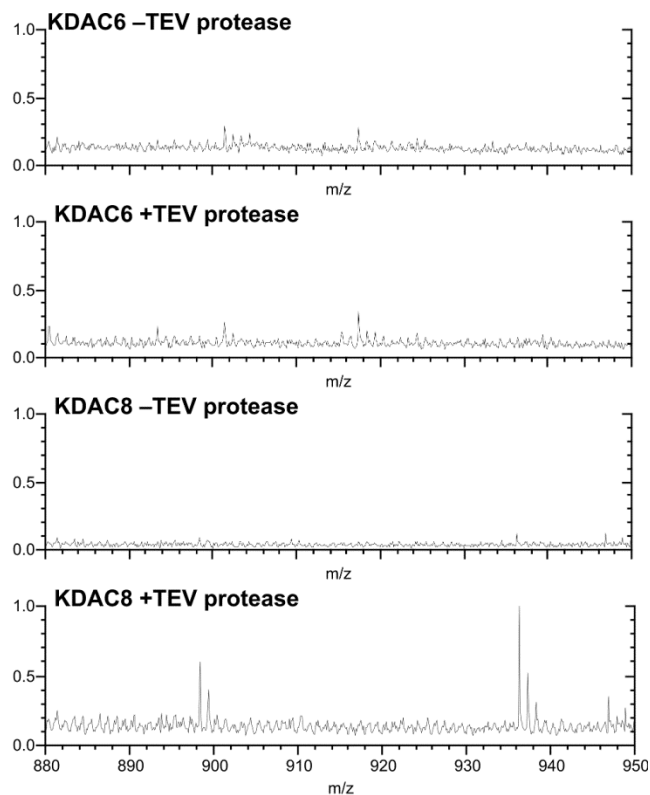

**Figure S1. Detection of the cleaved His<sub>6</sub> tag.** An equal amount of His<sub>6</sub> tagged KDAC6 and KDAC8 were incubated with TEV protease and the samples were subjected to MALDI-TOF analysis. A peak at the mass corresponding to the cleaved His<sub>6</sub> tag (898 m/z) as well as the tag containing potassium (936 m/z) was detected only in the KDAC8 sample. All spectra are normalized to the intensity of the 936 m/z peak in the KDAC8+TEV spectrum.

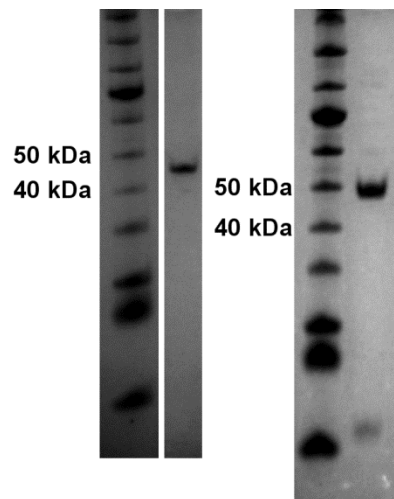

**Figure S2. Purified KDAC variants.** KDAC8HA (left) and KDAC4HY (right) were purified as described and subjected to SDS-PAGE. Both variants were obtained at similar purity to their wild-type counterparts (Figure 1).

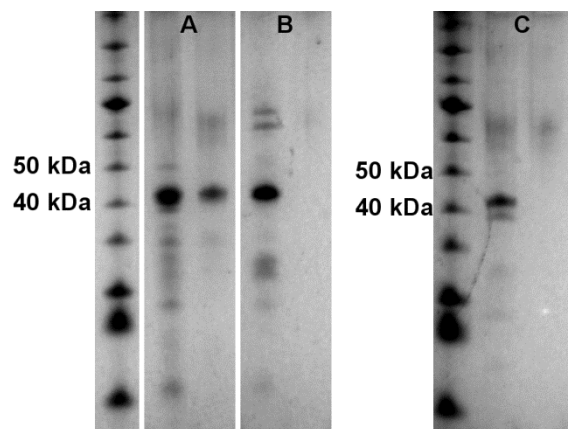

**Figure S3. Cobalt resin is critical for secondary purification.** KDAC8 was purified using cobalt- (A), nickel- (B) or zinc- (C) containing resin. The resulting protein was subjected to SDS-PAGE to determine whether KDAC8 was successfully recovered. In each gel, lane 1 is the protein after the first column and dialysis with TEV protease, and lane 2 is the protein that flowed through the second column (i.e., the desired final product). The first column resulted in partially purified protein in all three cases; however, KDAC8 was only recovered in the flow-through from the second column when cobalt resin was used.

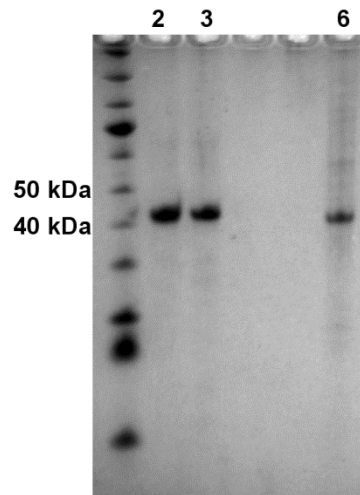

**Figure S4. Comparison of purified KDAC8 to commercial KDAC8.** Approximately 1  $\mu$ g of total protein from KDAC8 purified using our purification protocol (lane 2), BPS Bioscience (lane 3), and Novus Biologicals (lane 6) were subjected to SDS-PAGE.

**Table S1. Additional cobalt does not increase KDAC8 activity.**

| Co <sup>2+</sup><br>(fold excess) | Activity <sup>a</sup><br>(pmol min <sup>-1</sup> μg <sup>-1</sup> ) |
|-----------------------------------|---------------------------------------------------------------------|
| 0                                 | 2.12 ± 0.10                                                         |
| 0.5                               | 1.96 ± 0.17                                                         |
| 1                                 | 2.08 ± 0.11                                                         |
| 2                                 | 2.13 ± 0.03                                                         |
| 5                                 | 2.72 ± 0.09                                                         |
| 10                                | 2.64 ± 0.10                                                         |
| 100                               | 2.20 ± 0.19                                                         |

<sup>a</sup>Activity measured against Fluor-de-Lys substrate {K-ac}-AMC. Error represents standard deviation for technical triplicates.
